# Supplementary material for: Null models for understand intertidal decapods communities in North Patagonian beach (Pelluhuin, 41°S, Chile)
Source: Research Square preprint supplement (doi:10.21203/rs.3.rs-5921609/v1), 2025-04-04
Supplement: Supplementary file 1 [file cbd6c8b6097d49818479be88.xlsx]

## Sheet: Hoja1
n	A	B	C	D	E	A = Homolaspis plana
1	0	0	0	0	0	B = Petrolisthes granulosus
2	0	0	0	0	0	C = Cyclograpsus cinereus
3	0	0	0	0	0	D = Betaeus truncatus
4	1	0	0	0	0	E = Cancer porteri
5	0	0	0	0	0
6	0	0	0	0	0
7	0	0	0	0	0
8	0	0	0	0	0
9	0	0	0	0	0
10	0	0	0	0	0
11	0	0	0	0	0
12	0	0	0	0	0
13	0	0	0	0	0
14	0	0	0	0	0
15	0	1	0	0	0
16	0	0	0	0	0
17	0	0	0	0	0
18	0	0	0	0	0
19	0	0	1	0	0
20	0	0	0	0	0
21	0	0	0	0	0
22	0	0	0	0	0
23	0	0	0	0	0
24	0	0	0	0	0
25	0	0	0	0	0
26	0	3	0	0	0
27	0	0	0	1	0
28	1	0	0	0	0
29	0	0	0	0	0
30	0	1	0	0	0
31	0	1	0	0	0
32	0	1	0	0	0
33	0	0	0	0	0
34	0	0	0	0	0
35	0	0	0	0	0
36	0	0	0	0	0
37	0	0	0	0	0
38	0	0	0	1	0
39	0	0	0	0	0
40	0	0	0	0	0
41	0	0	0	0	0
42	0	0	0	0	0
43	0	0	0	0	0
44	0	0	0	0	0
45	0	0	1	0	0
46	1	0	0	0	0
47	0	0	0	0	0
48	1	0	0	0	0
49	0	0	0	0	0
50	1	0	0	0	0
51	0	0	0	1	0
52	2	0	0	0	0
53	1	0	0	0	0
54	0	0	0	0	0
55	0	0	0	0	0
56	1	0	0	0	0
57	1	0	0	0	0
58	1	0	0	0	0
59	1	0	0	0	0
60	0	0	0	0	0
61	0	0	0	0	0
62	0	0	0	0	0
63	0	0	1	0	0
64	0	0	0	0	0
65	0	0	0	1	0
66	2	0	0	0	0
67	1	0	0	0	0
68	0	0	0	0	0
69	0	0	0	0	0
70	1	0	0	0	0
71	1	0	0	0	0
72	1	0	0	0	0
73	1	0	0	0	0
74	0	0	0	0	1
75	0	0	0	0	0
76	0	0	0	0	1
77	0	0	0	0	1
78	0	0	0	0	0
79	0	0	0	0	0
80	0	0	0	0	0
81	1	0	0	0	0
82	0	0	0	0	0
83	1	0	0	0	0
84	1	0	0	0	0
85	1	0	0	0	0
86	0	0	0	0	0
87	0	0	0	0	0
88	0	1	0	0	0
89	0	2	0	0	0
90	0	1	0	0	0
